# Supplementary material
Source: ML conference proceedings conference paper supplement (https://proceedings.neurips.cc/paper_files/paper/2022/hash/6728fcf94660c59c938319a6833a6073-Abstract.html)
Supplement: Supplementary file 1 [file 6728fcf94660c59c938319a6833a6073-Supplemental-Conference.zip]

Archive with 8 entries (7 files):
- supplementary/
- __MACOSX/._supplementary
- supplementary/neurips_2022.zip
- __MACOSX/supplementary/._neurips_2022.zip
- supplementary/.DS_Store
- __MACOSX/supplementary/._.DS_Store
- supplementary/NeurIPS2022_camera_sup.pdf
- __MACOSX/supplementary/._NeurIPS2022_camera_sup.pdf
